# Supplementary material
Source: PubMed Central journal article supplement (PMC2736444)
Supplement: 0907660106_0907660106SI.pdf [file 0907660106_0907660106SI.pdf]

# Supporting Information

Rochefort et al. 10.1073/pnas.0907660106

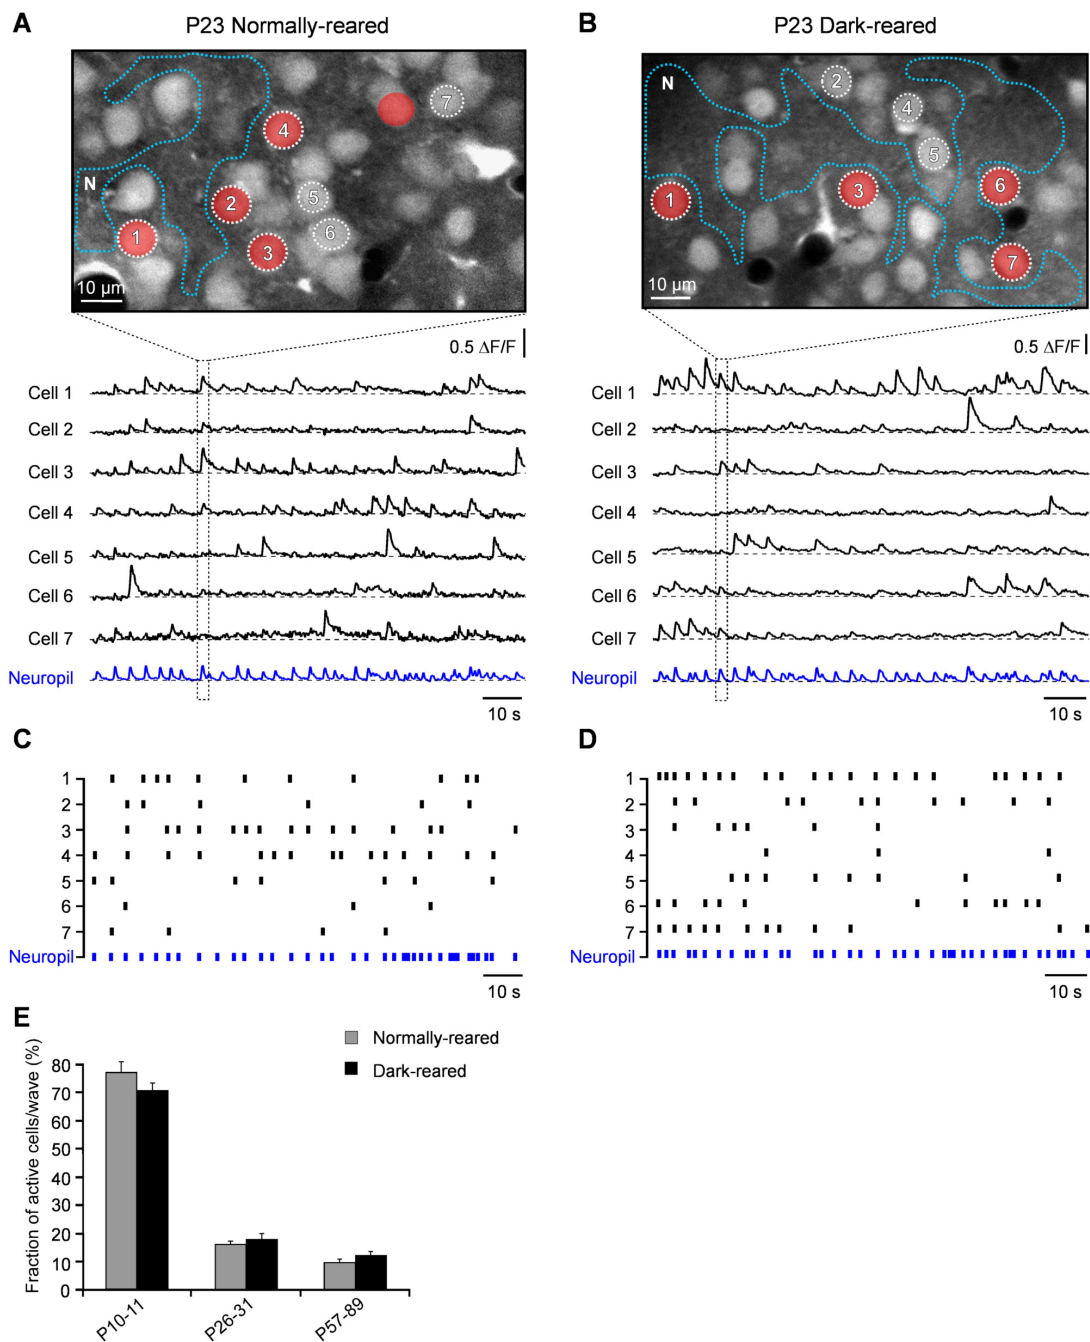

**Fig. S1.** Sparsification develops in the absence of visual experience. (*A* and *B*) Wave-associated  $\text{Ca}^{2+}$  transients in individual layer 2/3 neurons in a control (*A*) and in a dark-reared (*B*) 23-day-old mouse. The two images in the top row indicate the regions of interest. Bottom row: wave-associated  $\text{Ca}^{2+}$  transients in individual neurons. Active cells during a representative  $\text{Ca}^{2+}$  wave (indicated by dotted lines) are marked in red. (*C* and *D*) Dot plot representation of cellular responses during consecutive waves in a control (*C*) and in a dark-reared (*D*) 23-day-old mouse (same experiments as in *A* and *B*). (*E*) Mean values of the fraction of active cells per  $\text{Ca}^{2+}$  wave in control and dark reared mice at P11 ( $n = 6$  and  $5$ , respectively), P20–29 ( $n = 10$  and  $7$ , respectively) and P48–79 ( $n = 5$  and  $10$ , respectively). No significant difference in the activity pattern was found between control and dark-reared mice (Kolmogorov-Smirnov  $t$  test). Error bars represent standard error of the mean.

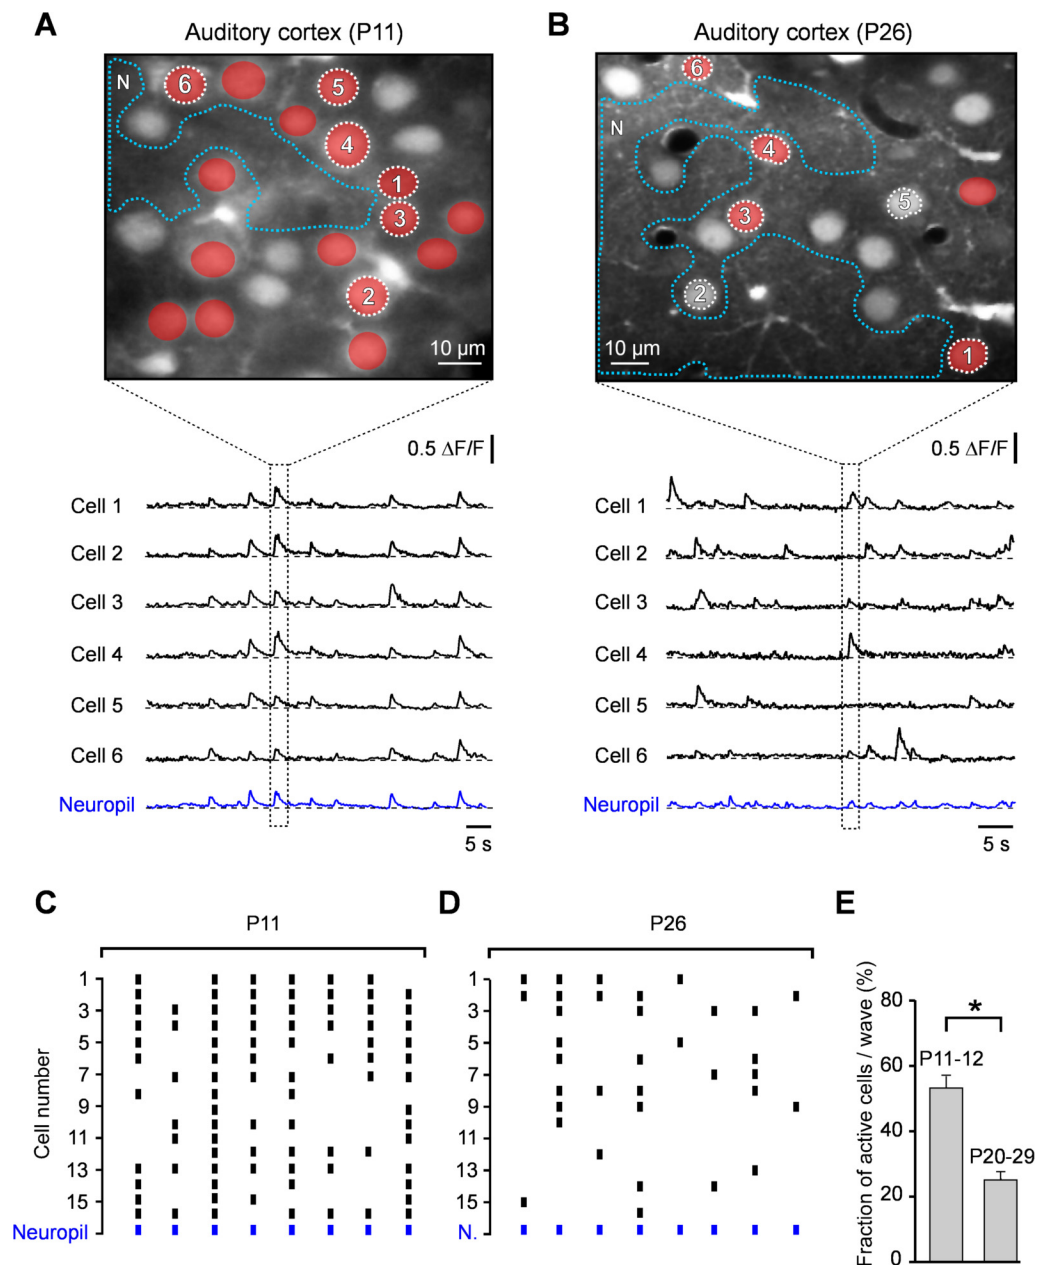

**Fig. S2.** Sparsification in the mouse auditory cortex. (A and B) Recordings from layer 2/3 in the auditory cortex of a P12 (A) and a P26-old mouse (B). The two images in the top row indicate the regions of interest. Bottom row: wave-associated  $\text{Ca}^{2+}$  transients in individual neurons (Top). Active cells during a representative  $\text{Ca}^{2+}$  wave (indicated by dotted lines) are marked in red. (C and D) Dot plot representation of cellular responses during 8 consecutive waves at P12 and P26, respectively (same experiments as in A and B). (E) Bar graph summarizing the results from all mice tested at P11–12 ( $n = 4$ ) and at P20–29 ( $n = 5$ ). Error bars represent standard error of the mean. The asterisks indicate significance (Kolmogorov-Smirnov test,  $P < 0.01$ ).
